# Supplementary material
Source: publisher site journal article supplement (https://www.dovepress.com/article/602144)
Supplement: Supplementary file 1 [file 602144%20Supplementary%20Material.pdf]

## Supplementary Material

White Hair–Induced Increased Scalp Visibility: Clinical Implications for Hair Loss Evaluation and Hair Transplantation

Jae Hyun Park | Dana Plastic Surgery Clinic, Seoul, South Korea

### Supplementary Fig. S1.

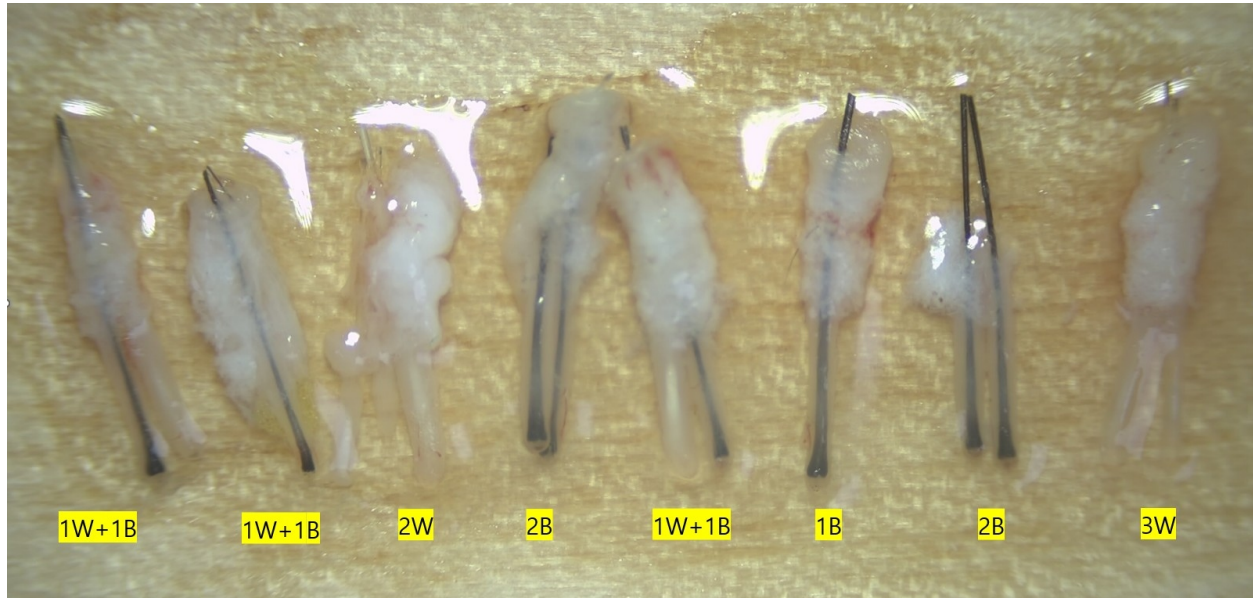

**Supplementary Fig. S1.** Follicular units harvested by follicular unit excision (FUE) from a patient with a high proportion of white hair. (W: white hair; B: black hair)

**Supplementary Fig. S2.**

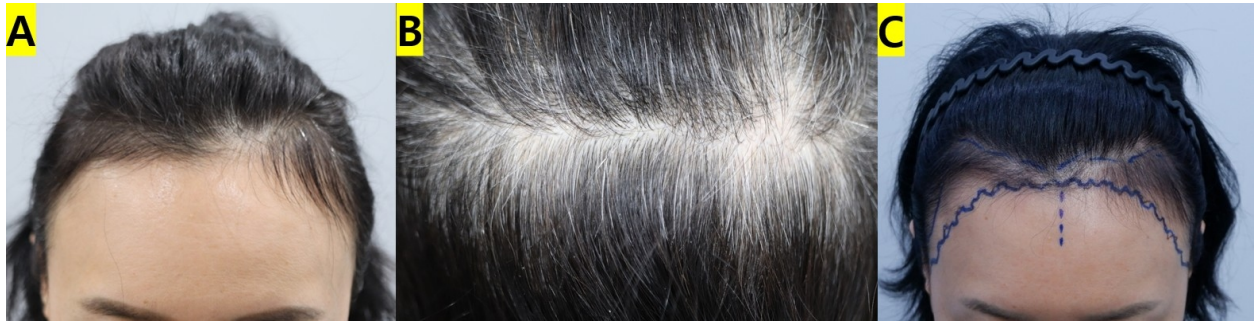

**Supplementary Fig. S2.** Representative case of preoperative dyeing in preparation for strip surgery (FUT). A 40-year-old female patient presented for hairline correction. Because strip surgery was planned, both the frontal and occipital hair were dyed preoperatively. (A) Frontal area at consultation showing approximately 5% white hair. (B) Occipital donor area at consultation showing approximately 40% white hair. (C) Hairline design on the day of surgery after dyeing.

**Supplementary Fig. S3.**

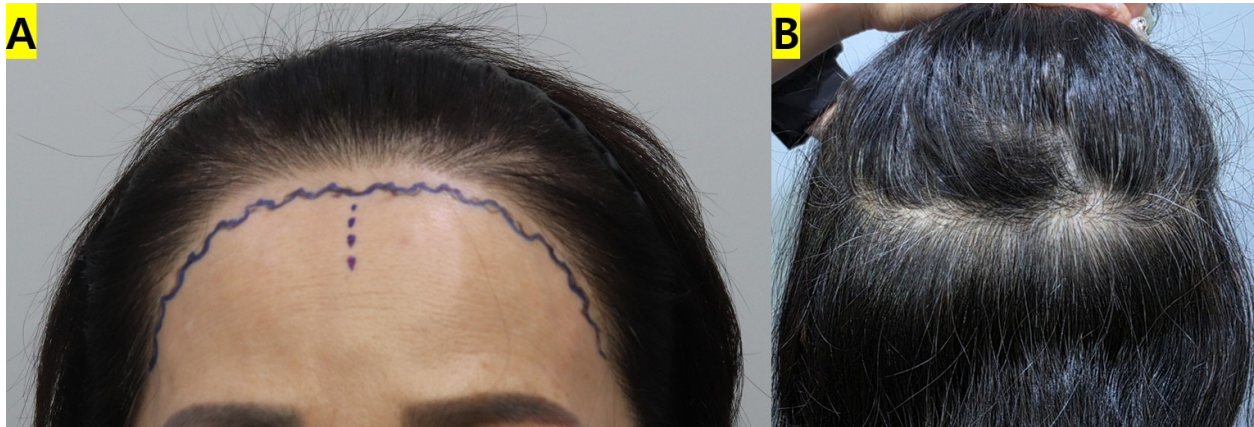

**Supplementary Fig. S3.** Representative case of selective transplantation of pigmented hair without dyeing despite the presence of white hair. A 52-year-old female patient presented for hairline correction (500 follicular units). Approximately 40% white hair was present in the occipital donor area with minimal white hair in the frontal region. Non-shaven FUE was performed without dyeing. (A) Hairline design on the day of surgery. (B) Occipital donor area without dyeing.

**Supplementary Fig. S4.**

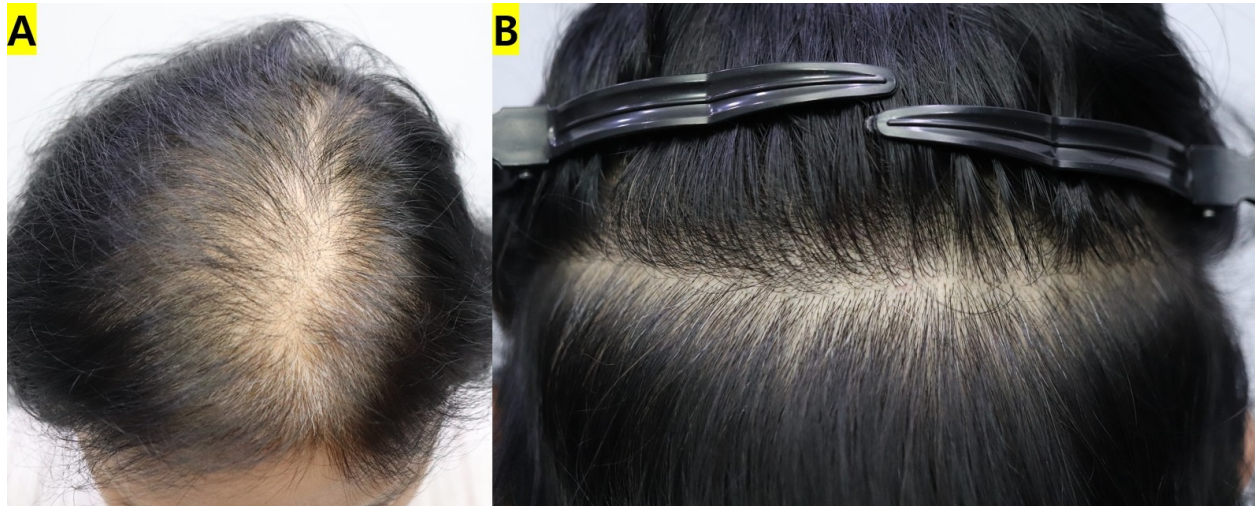

**Supplementary Fig. S4.** Representative case illustrating the indication for preoperative dyeing in strip surgery. A 63-year-old female patient presented with increased scalp visibility in the part-line area (approximately 70% white hair in the recipient area, approximately 15% in the donor area). Strip surgery was planned; therefore, preoperative dyeing of both areas was recommended. (A) Preoperative photograph of the part-line area. (B) Preoperative photograph of the occipital donor area.
